# Supplementary material
Source: publisher site journal article supplement (http://www.degruyter.com/publication/journal_key/AJLE/downloadAsset/AJLE_AJLE_CFP_Law%20and%20Economics%20of%20ChatGPT%20and%20Large%20Language%20Models.pdf)
Supplement: Supplementary file 1 [file AJLE_AJLE_CFP_Law%20and%20Economics%20of%20ChatGPT%20and%20Large%20Language%20Models.pdf]

# **Asian Journal of Law and Economics**

## **CALL FOR PAPERS**

### **Special Issue**

### **Law and Economics of ChatGPT and Large Language Models**

**DEADLINE: 1 September 2023**

Asian Journal of Law and Economics (AJLE) invites submissions for an upcoming special issue on “Law and Economics of ChatGPT and Large Language Models.” Accepted papers will be published in a special issue in December 2023. The special issue will be handled by a guest editor, Dennis W. K. Khong (Multimedia University, Malaysia).

#### **Relevant Topics**

ChatGPT and generative artificial intelligence tools using large language models have recently exhibited abilities close to what we typically perceive as artificial general intelligence (AGI). Artificial intelligence developers have successfully developed natural language understanding tools that can perform diverse tasks such as machine translation, reading comprehension, question answering and summarization abilities. This has raised the public’s alarm that artificial intelligence tools can potentially displace numerous existing jobs. Also, the public fears these tools in the wrong hands may be used for nefarious purposes. This special issue aims to provide a platform for researchers to publish articles on these issues, including but not limited to the law and economic aspects of the following:

- ChatGPT, BERT and pre-trained models
- Large language models
- Artificial general intelligence
- Natural language understanding
- Job displacement because of AI
- Universal Basic Income
- AI governance and regulation

#### **Guidelines for Submission**

1. Submission should follow the guidelines available at AJLE’s website: <https://www.degruyter.com/view/j/ajle>.
2. An abstract of not more than 150 words should accompany each manuscript. The abstract should briefly state the research’s purpose, principal results, and major conclusions.
3. For inquiries, please e-mail [wkkhong@mmu.edu.my](mailto:wkkhong@mmu.edu.my).
